# Supplementary material for: Selection and analysis of DNA aptamers to berberine to develop a label-free light-up fluorescent probe
Source: Royal Society of Chemistry journal article supplement (doi:10.1039/c6nj02290a), 2016-01-01
Supplement: c6nj02290a1.pdf [file c6nj02290a1.pdf]

## Supporting Information

### **Selection and analysis of DNA aptamers to berberine to develop label-free light-up fluorescent probe**

Jine Wang <sup>1#</sup>, Yajie Zhang <sup>1,2#</sup>, Hongyan Wang <sup>1</sup>, Yang Chen <sup>1,3</sup>, Lijun Xu <sup>1,2</sup>, Tian Gao <sup>1</sup>, Renjun Pei <sup>1\*</sup>

<sup>1</sup>Key Laboratory of Nano-Bio Interface, Suzhou Institute of Nano-Tech and Nano-Bionics, Chinese Academy of Sciences, Suzhou, 215123, China

<sup>2</sup>University of Chinese Academy of Sciences, Beijing, 100049, China

<sup>3</sup>School of Pharmacy, Xi'an Jiaotong University, Xi'an, 710061, China

#These authors contributed equally to this work.

\*Corresponding author. Key Laboratory of Nano-Bio Interface, Suzhou Institute of Nano-Tech and Nano-Bionics, Chinese Academy of Sciences, Suzhou, 215123, China.

Tel: +86-512-62872776, E-mail: [rjpei2011@sinano.ac.cn](mailto:rjpei2011@sinano.ac.cn).

**Table S1** The detailed sequences of i-motif structure, various G4 structures, random dsDNA and ssDNA used in this paper.

| Name    | Sequence (5' to 3')                                                        |
|---------|----------------------------------------------------------------------------|
| C29     | CCCCCTTCCCCCTTCCCCCTTCCCC                                                  |
| G3T4    | GGGTTTTGGGTTTTGGGTTTTGGG                                                   |
| G3TG4T  | TGGGTGGGGTGGGGTGGGT                                                        |
| G3T4TT  | GGGTTTTGGGTGGGTGGG                                                         |
| Hum21   | GGGTTAGGGTTAGGGTTAGGG                                                      |
| T30695  | GGGTGGGTGGGTGGGT                                                           |
| PS2.M   | GTGGGTAGGGCGGGTTGG                                                         |
| (dsDNA) | 1st strand: TATAATACACGTAGCATCTGACA<br>2nd strand: TGTCAGATGCTACGTGTATTATA |
| A20     | AAAAAAAAAAAAAAAAAAAAAAAAA                                                  |
| T20     | TTTTTTTTTTTTTTTTTTTTTTT                                                    |
| G20     | GGGGGGGGGGGGGGGGGGGGG                                                      |
| C20     | CCCCCCCCCCCCCCCCCCCCC                                                      |

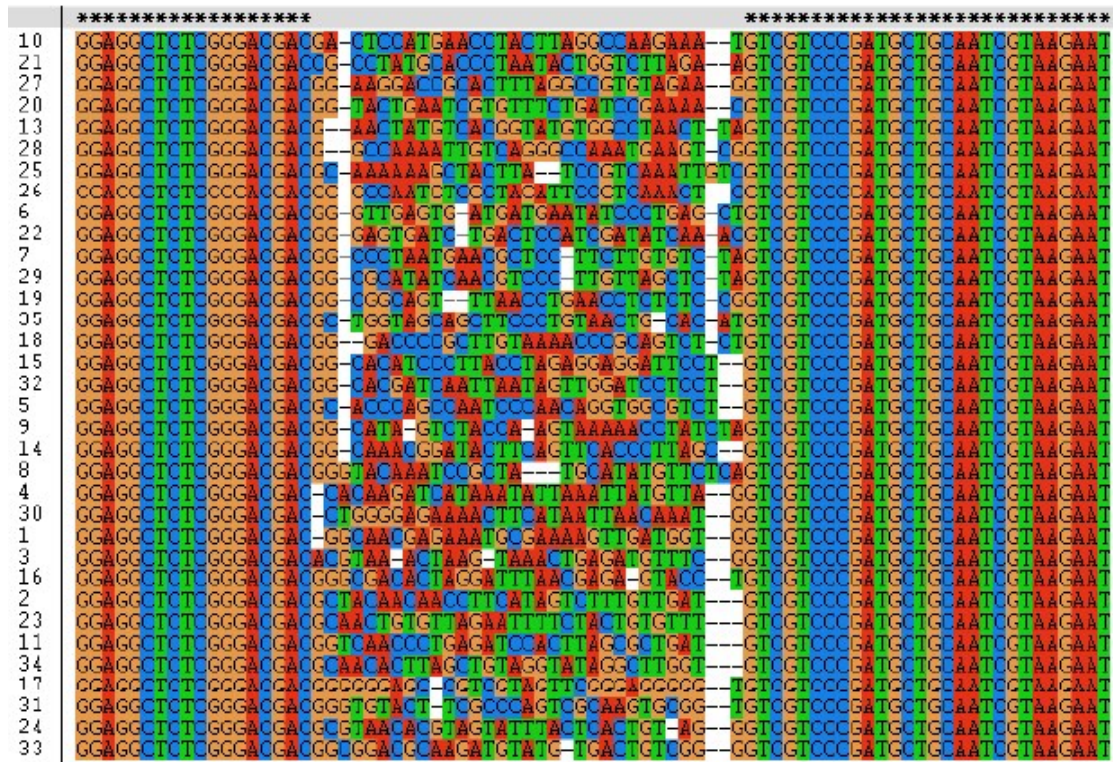

**Fig. S1** Sequence alignment analysis using Clustalx 1.8.3 software.

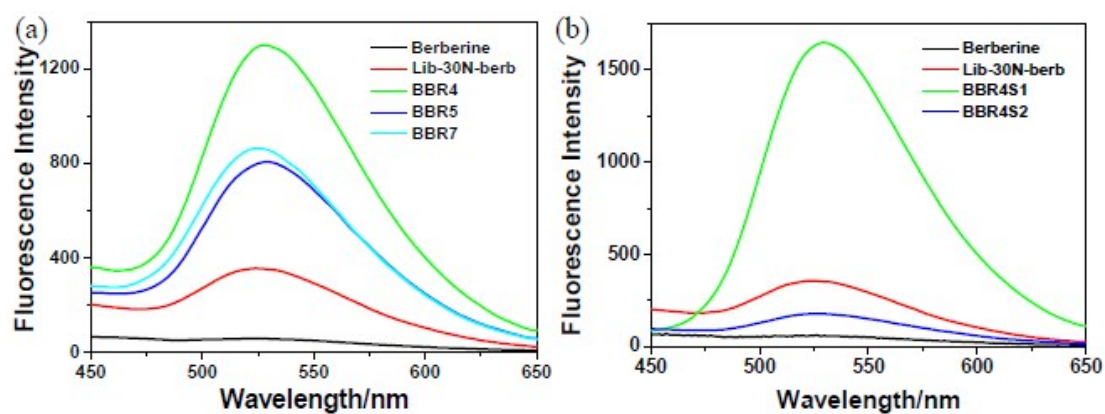

**Fig. S2** Fluorescence spectra of berberine alone and in the presence of initial ssDNA library, and different aptamers in SELEX buffer, respectively (a). Fluorescence spectra of berberine alone and in the presence of initial ssDNA library, BBR4S1 and BBR4S2 in SELEX buffer, respectively (b). The concentrations of berberine and DNA sequences all were 1  $\mu$ M.
